# Supplementary material
Source: HighWire-hosted journal article supplement (http://cmajopen.ca/highwire/filestream/81277/field_highwire_adjunct_files/2/2019-0038-3-at.pdf)
Supplement: 2019-0038-3-at.pdf [file 2019-0038-3-at.pdf]

| <b>Appendix 3 (as supplied by the authors):</b> Proportion of patients with a primary care coordination with home care billing code by LHIN and FHT vs. non-FHT |                                                  |                |
|-----------------------------------------------------------------------------------------------------------------------------------------------------------------|--------------------------------------------------|----------------|
| <b>LHIN</b>                                                                                                                                                     | <b>Primary care - home care coordination (%)</b> |                |
|                                                                                                                                                                 | <b>FHT</b>                                       | <b>non-FHT</b> |
| Erie St. Clair                                                                                                                                                  | 3.7                                              | 3.7            |
| South West                                                                                                                                                      | 6.6                                              | 6.2            |
| Waterloo Wellington                                                                                                                                             | 5.3                                              | 1.5            |
| Hamilton Niagara Haldimand Brant                                                                                                                                | 12.5                                             | 3.2            |
| Central West                                                                                                                                                    | 23.1                                             | 6.2            |
| Mississauga Halton                                                                                                                                              | 1.7                                              | 1.7            |
| Toronto Central                                                                                                                                                 | 3.0                                              | 2.3            |
| Central                                                                                                                                                         | 3.5                                              | 2.4            |
| Central East                                                                                                                                                    | 3.0                                              | 1.7            |
| South East                                                                                                                                                      | 12.6                                             | 3.7            |
| Champlain                                                                                                                                                       | 2.4                                              | 1.1            |
| North Simcoe Muskoka                                                                                                                                            | 4.8                                              | 2.6            |
| North East                                                                                                                                                      | 4.0                                              | 4.2            |
| North West                                                                                                                                                      | 9.0                                              | 1.2            |
